# Supplementary material for: Comparative Evaluation of Lumpy Skin Disease Virus-Based Live Attenuated Vaccines
Source: MDPI journal article supplement (doi:10.3390/vaccines9050473), 2021-05-08
Supplement: s1 [file s1]

Supplemental Figure S1

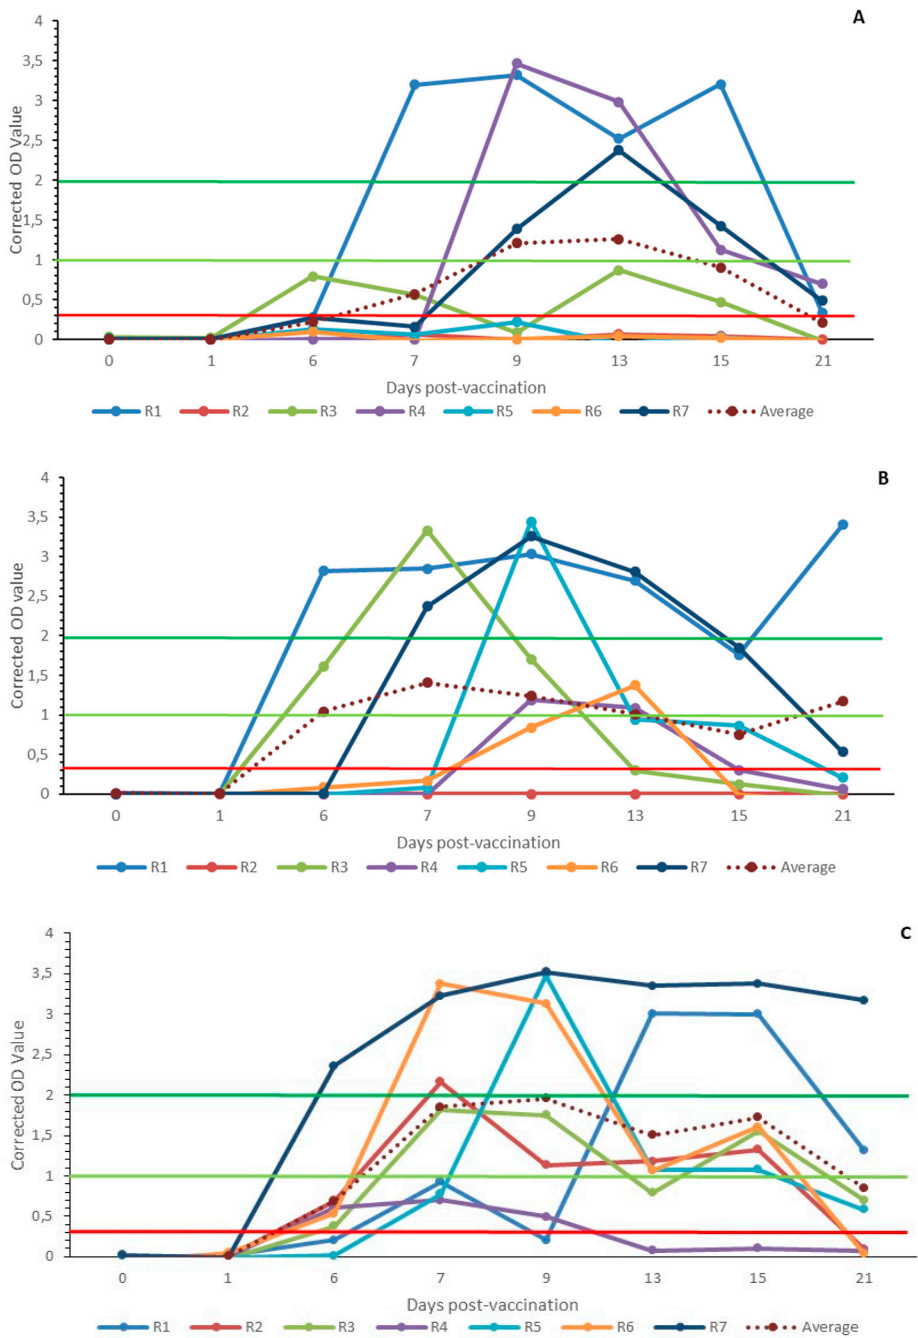

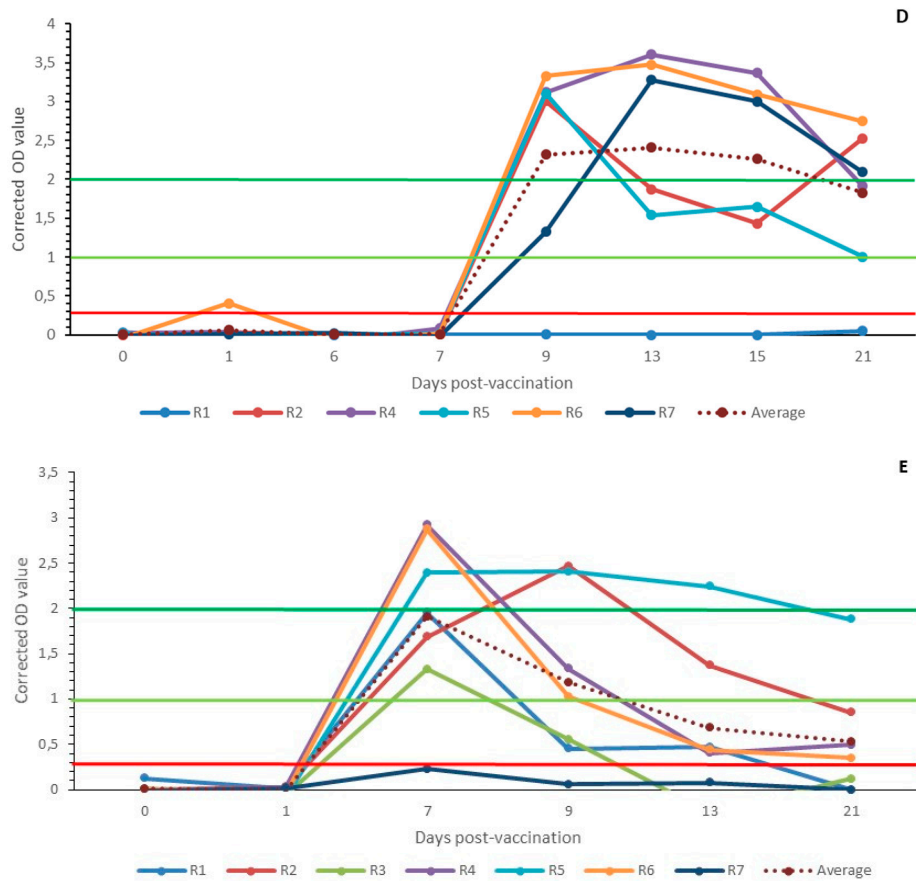

Figure S1: Corrected OD values post-vaccination for OBP (A), Lumpyvax (B), Kenyavac (C), Herbivac (D) and MCI (E). Red line: positivity cut-off; light green line: weak positive cut-off; dark green line: medium positive cut-off
